# Supplementary material for: Experimental arthritis and Porphyromonas gingivalis administration synergistically decrease bone regeneration in femoral cortical defects
Source: PubMed Central journal article supplement (PMC6934576; doi:10.1038/s41598-019-56265-6), 2019-12-27
Supplement: 41598_2019_56265_MOESM1_ESM.pdf [file 41598_2019_56265_MOESM1_ESM.pdf]

**Supplementary Information.**

Experimental arthritis and *Porphyromonas gingivalis* administration synergistically decrease bone regeneration in femoral cortical defects

Go Okumura<sup>1</sup>, Naoki Kondo<sup>1</sup>, Keisuke Sato<sup>2,3</sup>, Kazuhisa Yamazaki<sup>3</sup>, Hayato Ohshima<sup>4</sup>, Hiroyuki Kawashima<sup>1</sup>, Akira Ogose<sup>1</sup>, Naoto Endo<sup>1</sup>

<sup>1</sup>Division of Orthopedic Surgery, Department of Regenerative and Transplant Medicine, Niigata University Graduate School of Medical and Dental Sciences, Niigata, Japan

<sup>2</sup>Division of Periodontology, Department of Oral Science, Niigata University Graduate School of Medical and Dental Sciences, Niigata, Japan

<sup>3</sup>Research Unit for Oral-Systemic Connection, Division of Oral Science for Health Promotion, Niigata University Graduate School of Medical and Dental Sciences, Niigata, Japan

<sup>4</sup>Division of Anatomy and Cell Biology of the Hard Tissue, Department of Tissue Regeneration and Reconstruction, Niigata University Graduate School of Medical and Dental Sciences, Niigata, Japan

**Correspondence to:**

Go Okumura, MD, E-mail: [goingok@hotmail.com](mailto:goingok@hotmail.com)

**Supplementary Table. Detailed results (F value) of two-way analysis of variance  
BVd / TVd of bone regenerated area.**

| parameter | CIA factor                           | P.g factor                         | CIA×P.g interaction                 |
|-----------|--------------------------------------|------------------------------------|-------------------------------------|
| PO 2w     | F(1,26)=59.9,<br><u>P&lt;0.001</u>   | F(1,26)=60.2,<br><u>P&lt;0.001</u> | F(1,26)=41.6,<br><u>P&lt;0.001</u>  |
| PO 3w     | F(1,23)=69.6,<br><u>P&lt;0.001</u>   | F(1,23)=2.60,<br>P=0.12            | F(1,23)=1.38,<br>P=0.25.            |
| PO 4w     | F(1,25)=125.60,<br><u>P&lt;0.001</u> | F(1,25)=3.96,<br><u>P=0.06</u>     | F(1,25)=21.48,<br><u>P&lt;0.001</u> |

BVd/TVd; bone volume in cortical defect lesion / tissue volume in cortical defect lesion, CIA; collagen-induced arthritis, P.g; *Porphyromonas gingivalis* administration, PO; postoperative, P value with underline represents a significant difference.

**Osteoclast number / decalcified bone regenerated area.**

| parameter | CIA factor                         | P.g factor              | CIA×P.g interaction     |
|-----------|------------------------------------|-------------------------|-------------------------|
| PO 2w     | F(1,25)=1.85,<br>P=0.19            | F(1,25)=1.19,<br>P=0.29 | F(1,25)=0.13,<br>P=0.72 |
| PO 3w     | F(1,18)=51.2,<br><u>P&lt;0.001</u> | F(1,18)=0.99,<br>P=0.33 | F(1,18)=0.99,<br>P=0.33 |
| PO 4w     | F(1,21)=6.46,<br><u>P=0.02</u>     | F(1,21)=2.78,<br>P=0.11 | F(1,21)=0.06,<br>P=0.81 |

CIA; collagen-induced arthritis, P.g; *Porphyromonas gingivalis* administration, PO; postoperative, P value with underline represents a significant difference.

**Osteoblast surface / decalcified bone surface.**

| parameter | CIA factor                      | P.g factor                     | CIA×P.g interaction     |
|-----------|---------------------------------|--------------------------------|-------------------------|
| PO 2w     | F(1,20)=10.7,<br><u>P=0.004</u> | F(1,20)=7.59,<br><u>P=0.01</u> | F(1,20)=0.34,<br>P=0.54 |
| PO 3w     | F(1,20)=6.48,<br><u>P=0.02</u>  | F(1,20)=0.34,<br>P=0.57        | F(1,20)=0.35,<br>P=0.56 |

CIA; collagen-induced arthritis, P.g; *Porphyromonas gingivalis* administration, PO; postoperative, P value with underline represents a significant difference.

**Bone mineral density in proximal tibia at postoperative 2 weeks.**

| parameter | CIA factor                | P.g factor             | CIA×P.g interaction    |
|-----------|---------------------------|------------------------|------------------------|
|           | F value(1,25), P value    | F value(1,25), P value | F value(1,25), P value |
| TV        | F=3.61, P=0.07            | F=0.008, P=0.93        | F=0.55, P=0.47         |
| BV        | F=3.19, P=0.09            | F=0.39, P=0.54         | F=1.12, P=0.30         |
| BV/TV     | F=11.4, <u>P=0.002</u>    | F=0.50, P=0.49         | F=0.01, P=0.94         |
| Tb. Th    | F=2.23, P=0.15            | F=0.23, P=0.14         | F=0.21, P=0.65         |
| Tb. N     | F=4.04, P=0.06            | F=0.62, P=0.44         | F=0.001, P=0.97        |
| Tb. Sp    | F=7.39, <u>P=0.01</u>     | F=0.001, P=0.98        | F=0.02, P=0.88         |
| Tb. Spac  | F=4.59, <u>P=0.04</u>     | F=0.61, P=0.44         | F=0.15, P=0.70         |
| TMD       | F=8.08, <u>P=0.009</u>    | F=3.98, P=0.06         | F=4.90, <u>P=0.04</u>  |
| vBMD      | F=22.6, <u>P&lt;0.001</u> | F=3.58, P=0.07         | F=5.35, <u>P=0.03</u>  |

CIA; collagen-induced arthritis, P.g; *Porphyromonas gingivalis* administration, TV; tissue volume, BV; bone volume, Tb. Th; trabecular thickness, Tb.N; trabecular number, Tb.Sp; trabecular separation, Tb.Spac; trabecular spacing, TMD; tissue mineral density, vBMD; volumetric bone mineral density, P value with underline represents a significant difference.

**Bone mineral density at postoperative 4 weeks.**

| parameter | CIA factor                | P.g factor                | CIA×P.g interaction    |
|-----------|---------------------------|---------------------------|------------------------|
|           | F value(1,25), P value    | F value(1,25), P value    | F value(1,25), P value |
| TV        | F=0.19, P=0.67            | F=1.41, P=0.25            | F=0.17, P=0.68         |
| BV        | F=22.7, <u>P&lt;0.001</u> | F=10.6, <u>P=0.003</u>    | F=1.41, P=0.25         |
| BV/TV     | F=43.9, <u>P&lt;0.001</u> | F=11.2, <u>P=0.003</u>    | F=1.38, P=0.25         |
| Tb. Th    | F=7.03, <u>P=0.01</u>     | F=0.17, P=0.69            | F=0.41, P=0.53         |
| Tb. N     | F=17.4, <u>P&lt;0.001</u> | F=23.2, <u>P&lt;0.001</u> | F=0.52, P=0.48         |
| Tb. Sp    | F=5.15, <u>P=0.03</u>     | F=3.28, P=0.08            | F=0.29, P=0.61         |
| Tb. Spac  | F=1.87, P=0.18            | F=3.44, P=0.08            | F=0.09, P=0.77         |
| TMD       | F=25.4, <u>P&lt;0.001</u> | F=6.24, <u>P=0.02</u>     | F=3.49, P=0.07         |
| vBMD      | F=66.3, <u>P&lt;0.001</u> | F=17.6 <u>P&lt;0.001</u>  | F=6.72, <u>P=0.02</u>  |

CIA; collagen-induced arthritis, P.g; *Porphyromonas gingivalis* administration, TV; tissue volume, BV; bone volume, Tb. Th; trabecular thickness, Tb.N; trabecular number, Tb.Sp; trabecular separation, Tb.Spac; trabecular spacing, TMD; tissue mineral density, vBMD; volumetric bone mineral density, P value with underline represents a significant difference.

**Serum levels of TNF- $\alpha$ .**

| parameter | CIA factor                         | P.g factor                     | CIA×P.g interaction             |
|-----------|------------------------------------|--------------------------------|---------------------------------|
| PO2w      | F(1,19)=8.18,<br><u>P=0.010</u>    | F(1,19)=1.26,<br>P=0.28        | F(1,19)=7.65,<br><u>P=0.012</u> |
| PO3w      | F(1,18)=2.33,<br>P=0.14            | F(1,18)=0.51,<br>P=0.82        | F(1,18)=0.00,<br>P=0.97         |
| PO4w      | F(1,20)=25.7,<br><u>P&lt;0.001</u> | F(1,20)=7.93,<br><u>P=0.01</u> | F(1,20)=10.0,<br><u>P=0.005</u> |

TNF; tumor necrosis factor, CIA; collagen-induced arthritis, P.g; *Porphyromonas gingivalis* administration, PO; postoperative, P value with underline represents a significant difference.
